# Supplementary material
Source: MDPI journal article supplement (https://www.mdpi.com/2072-4292/9/7/691)
Supplement: s1 [file s1]

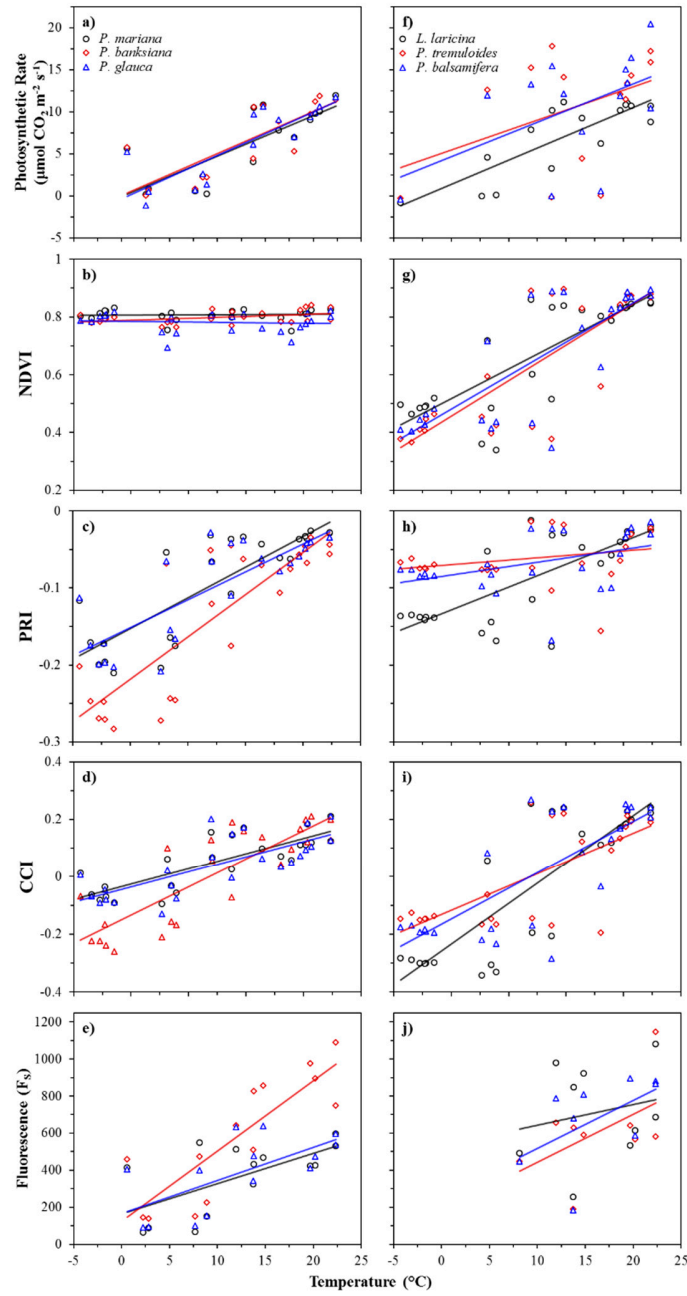

**Figure S1:** Correlations between daily average temperature, photosynthetic rate ( $\mu\text{mol CO}_2 \text{ m}^{-2} \text{ s}^{-1}$ ), NDVI, PRI, CCI, or fluorescence for evergreen (a–e) and deciduous (f–j) species. Temperature is expressed as a daily average. Data points for other metrics were obtained near solar noon from January 2016 to December 2016. For reflectance indices (NDVI, PRI, CCI), canopy data with snow present were excluded.  $R^2$  values and significance are given in the figure legends. \*,  $P < 0.05$ ; \*\*,  $P < 0.01$ ; \*\*\*,  $P < 0.001$ ; \*\*\*\*,  $P < 0.0001$ .
